# Supplementary material for: Bacterial biogeography of the human digestive tract
Source: PubMed Central journal article supplement — Sci Rep. 2011 Nov 25;1:170. doi: 10.1038/srep00170 (PMC3240969; doi:10.1038/srep00170), 2011-11-25
Supplement: srep00170-s1.pdf [file srep00170-s1.pdf]

# SUPPORTING INFORMATION

## Bacterial biogeography of the human digestive tract

Jennifer C. Stearns<sup>a†</sup>, Michael D.J. Lynch<sup>a,b</sup>, Dilani B. Senadheera<sup>c</sup>, Howard C. Tenenbaum<sup>c</sup>,  
Michael B. Goldberg<sup>c</sup>, Dennis G. Cvitkovitch<sup>c</sup>, Kenneth Croitoru<sup>d</sup>, Gabriel Moreno-Hagelsieb<sup>b</sup>,  
and Josh D. Neufeld<sup>a\*</sup>.

<sup>a</sup>Department of Biology, University of Waterloo, Waterloo, Ontario, N2L 3G1, Canada.

<sup>b</sup>Department of Biology, Wilfrid Laurier University, Waterloo, Ontario, N2L 3C5, Canada.

<sup>c</sup>Faculty of Dentistry, University of Toronto, Toronto, Ontario, M5G 1G6, Canada.

<sup>d</sup>Department of Medicine, University of Toronto, Zane Cohen Center for Digestive Diseases,  
Mount Sinai Hospital, Toronto, Ontario, M5G 1X5, Canada.

<sup>†</sup>Present address: Farncombe Family Center for Microbiome Research, Health Sciences Center,  
McMaster University, 1280 Main Street West, Hamilton, Ontario, L8S 4K1, Canada

\*Corresponding author: [jneufeld@uwaterloo.ca](mailto:jneufeld@uwaterloo.ca)

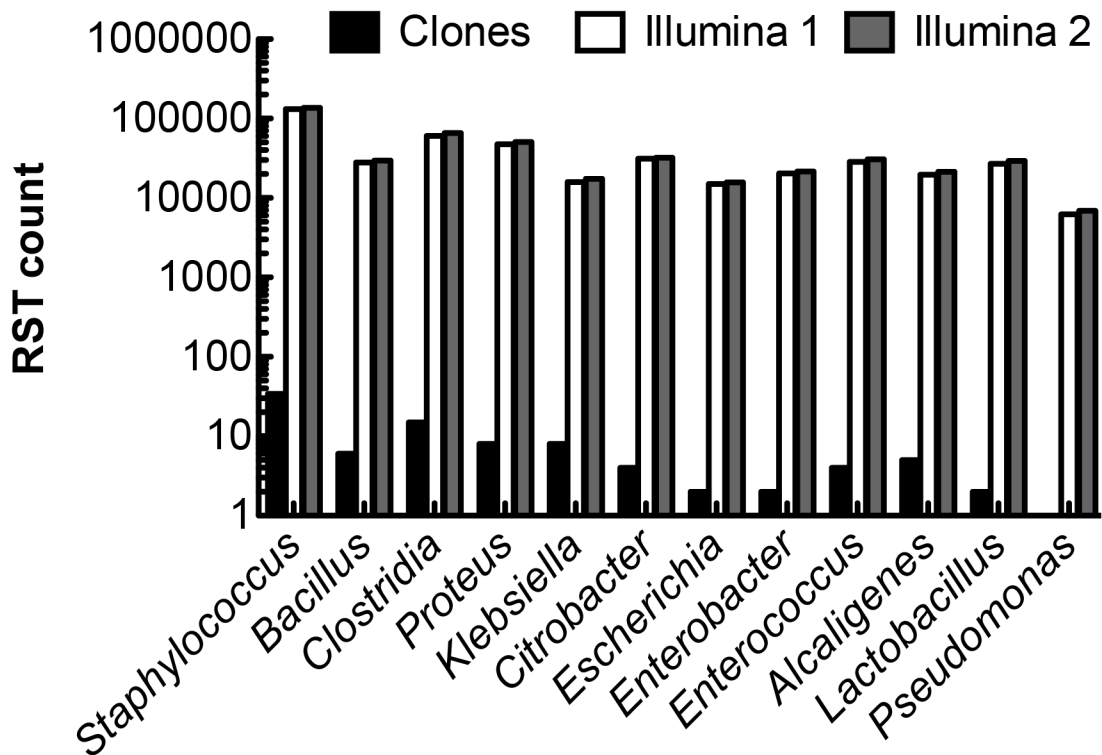

**Fig. S1.** Comparison of two sequencing methods for measurement of populations within a simulated bacterial community that included 12 organisms. A library of 96 clones, sequenced with the traditional Sanger method was compared to a library of approximately 500,000 sequences returned with the Illumina method (shown in duplicate). No results were obtained for *Pseudomonas* within the clone library, however many sequences for this organism were returned within the Illumina libraries. DNA for all organisms was added in equal amounts, except for *Staphylococcus* for which more was added.

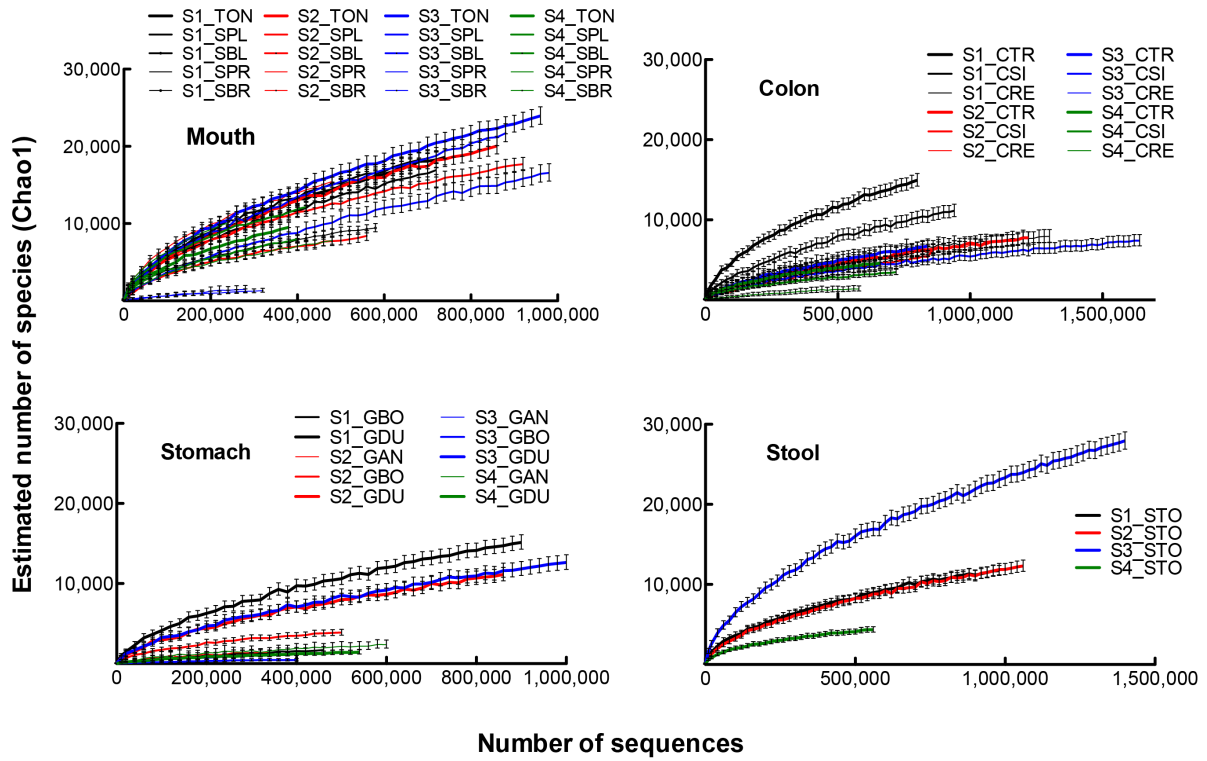

**Fig. S2.** Species estimates for all samples grouped by site. Average Chao1 is presented from five iterations of rarified subsets of all sequences (on the x-axis) and error bars represent the upper and lower limits of the 95% confidence interval.

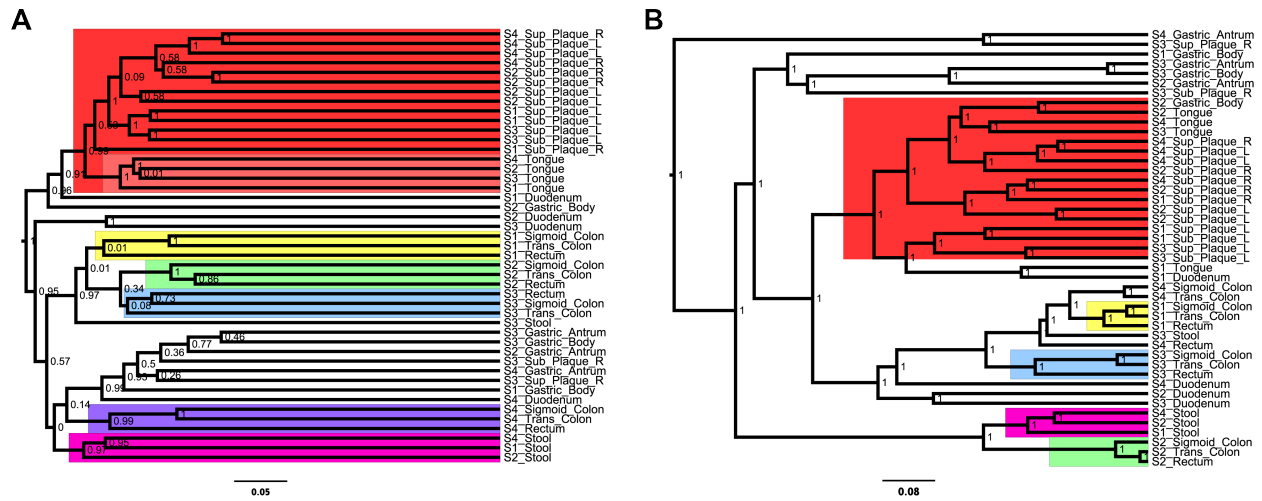

**Fig. S3.** UPGMA trees of A) unweighted UniFrac and B) weighted UniFrac distances. Nodes are labeled with Jackknife values calculated with 100 iterations of 200,000 sequences. Branch colours: mouth (red), tongue plaque (light red), stool (magenta), subject 1 colon (yellow), subject 2 colon (green), subject 3 colon (blue), subject 4 colon (purple).

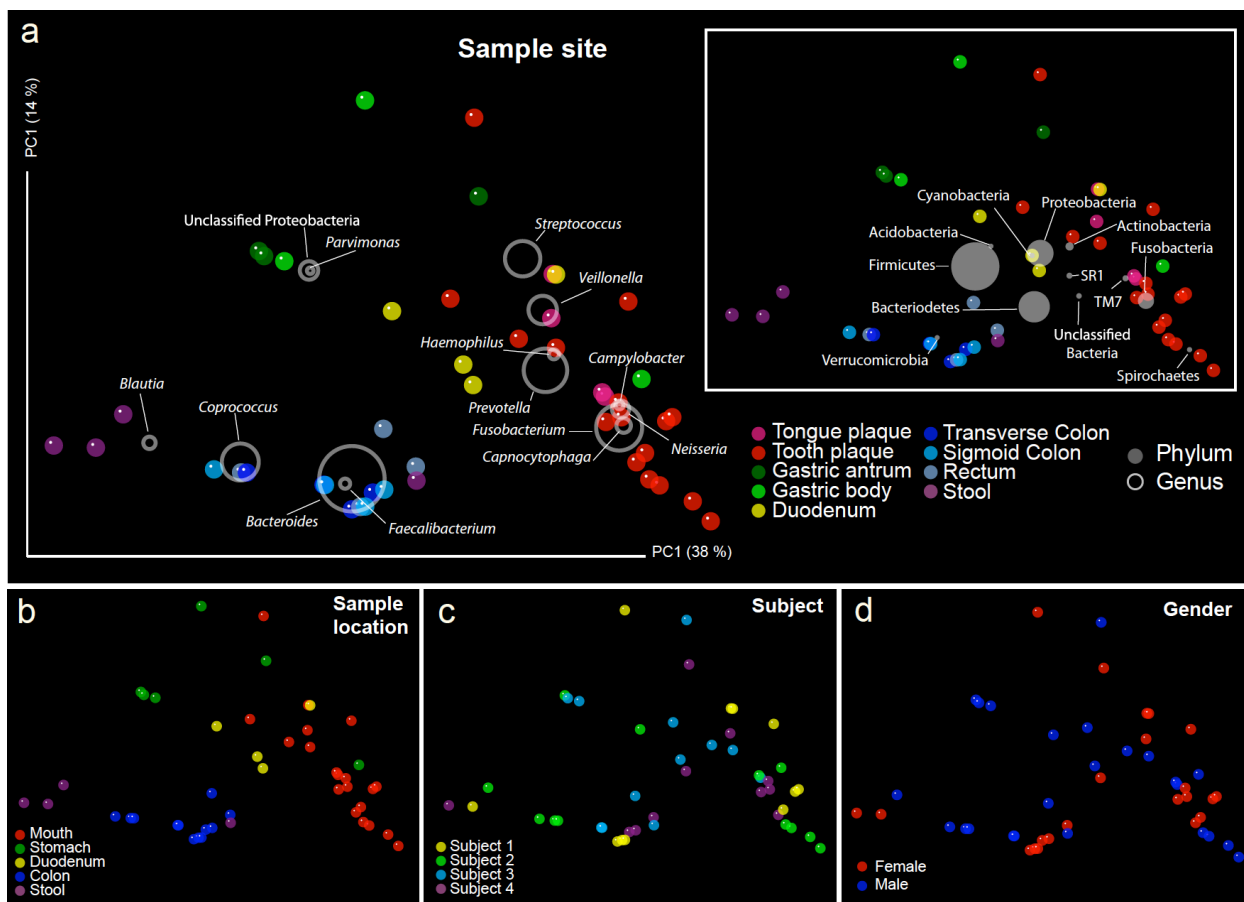

**Fig. S4.** Contribution of different taxonomic groups to separation of samples based on bacterial abundance and phylogenetic information. The contribution of each group is represented by the size of the circles (grey) overlaid onto a PCoA of weighted UniFrac distances for all samples within the oral and digestive tract. Panels (a-d) represent variations in sample colouration to highlight potential relationships between sample clustering and metadata.

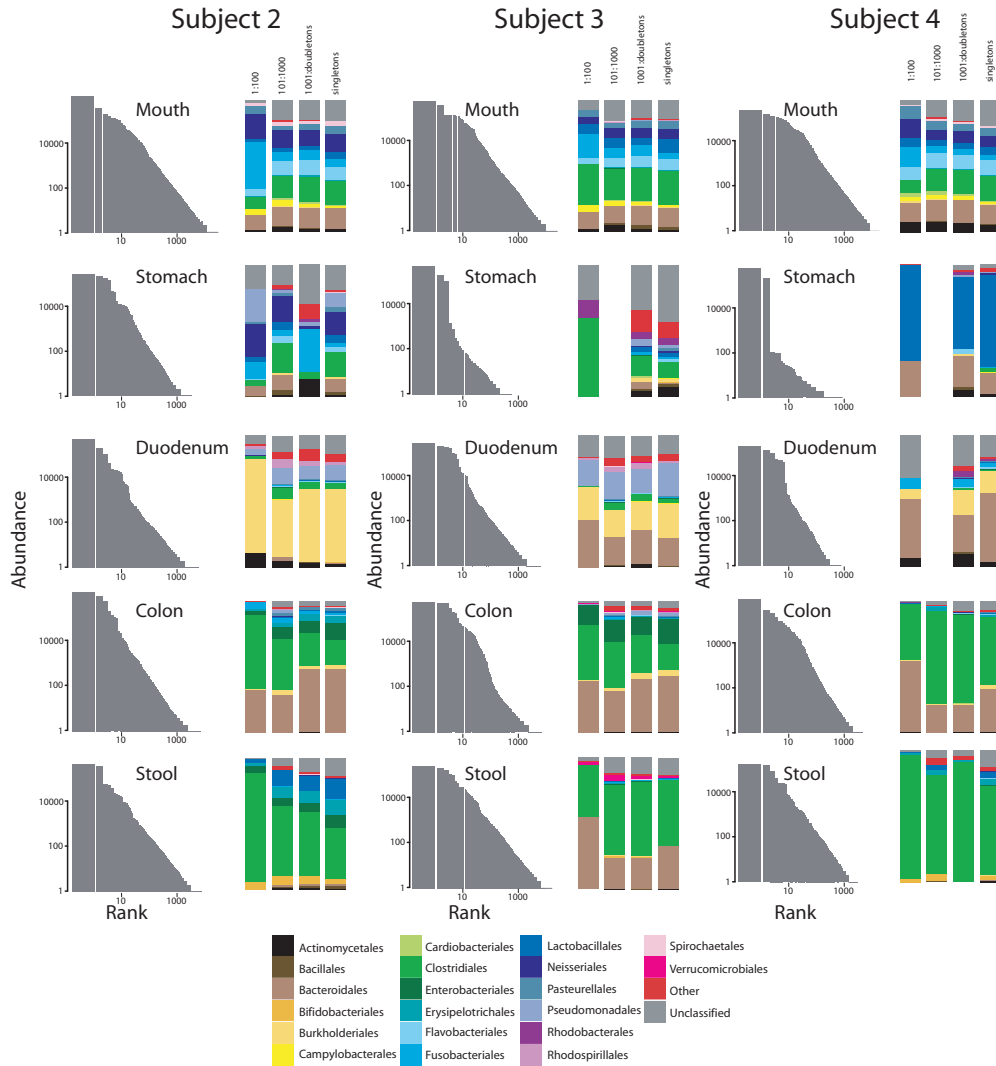

**Fig. S5.** Rank abundance plots and proportional taxonomic bar plots for sequences from Subjects 2-4 pooled within various body sites and assigned to order. To demonstrate taxonomic distribution at decreasing ranks phylotypes were split according to different logarithmic abundance ranges as appropriate. The low abundance orders comprising the ‘Other’ category included Synergistales, Halanaerobiales, Mycoplasmatales, Xanthomonadales, Sphingobacteriales, Caulobacterales, Desulfobacterales, Legionellales, Oceanospirillales, Deinococcales, Methanobacteriales, Myxococcales, Anaerolineales, Methylophilales, Chromatiales, Thermales, Bdellovibrionales, Desulfuromonadales, Solirubrobacteriales, Methanomicrobiales, Planctomycetales, Methylococcales, Anaeroplasmatales, Coriobacteriales, Desulfovibrionales, Rhizobiales, Rhodocyclales, Sphingomonadales, Victivallales.

**Table S1.** Number of clusters (phylotypes) over various sequence identity thresholds using the CD-HIT analysis package for all sequences over all treatments.

| <b>Cluster (%)</b> | <b>CD-HIT</b> |
|--------------------|---------------|
| 99                 | 665,076       |
| 98                 | 203,148       |
| 97                 | 97,251        |
| 96                 | 49,355        |
| 95                 | 32,017        |

**Table S2.** Summary table of samples and sequencing results. The number of sequences refers to the number of assembled sequences after error filtering. The number of phylotypes is the number of sequence clusters with 97% identity.

| Subject                    | Gender         | Site         | Sample                     | Sequence counts | Phylotype counts        | Good's coverage |           |         |                         |
|----------------------------|----------------|--------------|----------------------------|-----------------|-------------------------|-----------------|-----------|---------|-------------------------|
| 1                          | Female         | Mouth        | Tongue                     | 749,110         | 7,249                   | 0.994           |           |         |                         |
|                            |                |              | Subgingival - left side    | 712,873         | 7,749                   | 0.994           |           |         |                         |
|                            |                |              | Supragingival - left side  | 580,927         | 4,794                   | 0.996           |           |         |                         |
|                            |                |              | Supragingival - right side | 725,916         | 6,971                   | 0.994           |           |         |                         |
|                            |                |              | Supragingival - right side | 23,555          | 427                     | 0.990           |           |         |                         |
|                            |                | Stomach      | Gastric body               | 466,105         | 543                     | 0.999           |           |         |                         |
|                            |                |              | Duodenum                   | Duodenum        | 905,619                 | 6,039           | 0.996     |         |                         |
|                            |                |              |                            | Colon           | Transverse              | 806,472         | 6,634     | 0.995   |                         |
|                            |                |              |                            |                 | Sigmoid                 | 947,940         | 4,467     | 0.997   |                         |
|                            |                |              |                            |                 | Rectum                  | 1,305,935       | 2,550     | 0.999   |                         |
|                            |                |              |                            |                 | Stool                   | Stool           | 985,754   | 5,681   | 0.997                   |
|                            |                |              |                            |                 |                         | Mouth           | Tongue    | 865,725 | 7,892                   |
|                            |                |              |                            |                 | 2                       |                 | Male      | Mouth   | Subgingival - left side |
| Supragingival - left side  | 417,865        | 5,572        | 0.993                      |                 |                         |                 |           |         |                         |
| Supragingival - right side | 928,856        | 7,921        | 0.995                      |                 |                         |                 |           |         |                         |
| Supragingival - right side | 494,229        | 7,428        | 0.992                      |                 |                         |                 |           |         |                         |
| Stomach                    | Gastric antrum | 358,061      | 588                        | 0.999           |                         |                 |           |         |                         |
|                            | Duodenum       | Gastric body | 505,693                    | 1,883           |                         | 0.998           |           |         |                         |
|                            |                | Duodenum     | 879,898                    | 4,155           |                         | 0.997           |           |         |                         |
| Colon                      |                |              | Transverse                 | 1,239,858       |                         | 2,916           |           | 0.999   |                         |
|                            |                |              | Sigmoid                    | 852,442         |                         | 1,669           |           | 0.999   |                         |
|                            |                |              | Rectum                     | 1,195,591       |                         | 2,666           |           | 0.999   |                         |
|                            |                |              | Stool                      | Stool           |                         | 1,063,904       |           | 5,541   | 0.997                   |
|                            |                |              |                            | Mouth           |                         | Tongue          |           | 976,495 | 9,648                   |
| 3                          | Male           | Mouth        | Subgingival - left side    |                 |                         | 892,482         |           | 8,268   | 0.994                   |
|                            |                |              | Supragingival - left side  | 338,944         | 565                     | 0.999           |           |         |                         |
|                            |                |              | Supragingival - right side | 995,946         | 5,853                   | 0.996           |           |         |                         |
|                            |                |              | Supragingival - right side | 281,634         | 411                     | 0.999           |           |         |                         |
|                            |                |              | Stomach                    | Gastric antrum  | 269,779                 | 348             | 0.999     |         |                         |
|                            |                | Duodenum     |                            | Gastric body    | 405,549                 | 202             | 1.000     |         |                         |
|                            |                |              |                            | Duodenum        | 1,006,884               | 4,635           | 0.997     |         |                         |
|                            |                | Colon        |                            |                 | Transverse              | 848,073         | 2,547     | 0.998   |                         |
|                            |                |              |                            |                 | Sigmoid                 | 1,652,488       | 2,663     | 0.999   |                         |
|                            |                |              |                            |                 | Rectum                  | 424,944         | 1,408     | 0.998   |                         |
|                            |                |              |                            |                 | Stool                   | Stool           | 1,408,777 | 12,426  | 0.995                   |
|                            |                |              |                            |                 |                         | Mouth           | Tongue    | 390,262 | 4,357                   |
|                            |                | 4            | Female                     | Mouth           | Subgingival - left side |                 | 406,422   | 3,858   | 0.995                   |
| Supragingival - left side  | 243,717        |              |                            |                 | 4,858                   | 0.989           |           |         |                         |
| Supragingival - right side | 421,279        |              |                            |                 | 5,861                   | 0.993           |           |         |                         |
| Supragingival - right side | 489,144        |              |                            |                 | 3,829                   | 0.996           |           |         |                         |



|          |                |              |              |                |
|----------|----------------|--------------|--------------|----------------|
| Stomach  | Gastric antrum | 607,152      | 657          | 0.999          |
| Duodenum | Duodenum       | 551,726      | 602          | 0.999          |
| Colon    | Transverse     | 678,894      | 2,248        | 0.998          |
|          | Sigmoid        | 738,341      | 1,776        | 0.999          |
|          | Rectum         | 589,654      | 494          | 0.999          |
| Stool    | Stool          | 564,162      | 2,359        | 0.998          |
|          |                | <b>Total</b> | <b>Total</b> | <b>Average</b> |
|          |                | 32,770,833   | 184,752      | 0.996          |

---

**Table S3.** Sequence counts for phyla present in each sample. See Excel spreadsheet.

**Table S4.** Sequence counts for genera present in each sample. See Excel spreadsheet.

**Table S5.** List of sequence counts for 97% OTU clusters shared across all subjects and all sampling regions. Taxonomy is based on the RDP classifier. See Excel spreadsheet.

**Table S6.** Prevalence in each sample of medically important species. Counts derived from blastn results with 99% sequence identity

|             |                        | <i>Faecalibacterium<br/>prausnitzii</i> | <i>Clostridium<br/>difficile</i> | <i>Streptococcus<br/>mutans</i> | <i>Treponema<br/>denticola</i> | <i>Pseudomonas<br/>aeruginosa</i> | <i>Pseudomonas<br/>aeruginosa</i> | Segmented<br>filamentous<br>bacterium | <i>Helicobacter<br/>hepaticus</i> |
|-------------|------------------------|-----------------------------------------|----------------------------------|---------------------------------|--------------------------------|-----------------------------------|-----------------------------------|---------------------------------------|-----------------------------------|
| Species:    |                        |                                         |                                  |                                 |                                |                                   |                                   |                                       |                                   |
| Strain:     |                        | ATCC 27768                              | 630                              | NCTC 10449                      | ATCC 35405                     | LMG 1242T                         | ATCC 10145                        |                                       | ATCC 51449                        |
| Accession:  |                        | AJ413954                                | AM180355                         | AJ243965                        | AF139203                       | Z76651                            | AF094713                          | X77814                                | AE017125                          |
| Subject 1   | Mouth Tongue           | 21                                      | 0                                | 0                               | 0                              | 0                                 | 0                                 | 0                                     | 0                                 |
|             | Mouth Supra_R          | 0                                       | 0                                | 3                               | 0                              | 0                                 | 0                                 | 0                                     | 0                                 |
|             | Mouth Supra_L          | 7                                       | 0                                | 309                             | 0                              | 0                                 | 0                                 | 0                                     | 0                                 |
|             | Mouth Sub_R            | 1                                       | 0                                | 902                             | 0                              | 0                                 | 0                                 | 0                                     | 0                                 |
|             | Mouth Sub_L            | 13                                      | 0                                | 0                               | 0                              | 0                                 | 0                                 | 0                                     | 0                                 |
|             | Stomach Gastric_Body   | 0                                       | 0                                | 0                               | 0                              | 1                                 | 1                                 | 0                                     | 0                                 |
|             | Duodenum Duodenum      | 20                                      | 0                                | 0                               | 0                              | 0                                 | 0                                 | 0                                     | 0                                 |
|             | Colon Transverse       | 55580                                   | 0                                | 0                               | 0                              | 0                                 | 0                                 | 0                                     | 0                                 |
|             | Colon Sigmoid          | 66769                                   | 0                                | 0                               | 0                              | 0                                 | 0                                 | 0                                     | 0                                 |
|             | Colon Rectum           | 59736                                   | 0                                | 0                               | 0                              | 0                                 | 0                                 | 0                                     | 0                                 |
|             | Stool Stool            | 16497                                   | 0                                | 0                               | 0                              | 0                                 | 0                                 | 0                                     | 0                                 |
| Subject 2   | Mouth Tongue           | 16                                      | 0                                | 0                               | 36                             | 0                                 | 0                                 | 0                                     | 0                                 |
|             | Mouth Supra_R          | 0                                       | 0                                | 0                               | 625                            | 0                                 | 0                                 | 0                                     | 0                                 |
|             | Mouth Supra_L          | 14                                      | 0                                | 6                               | 625                            | 0                                 | 0                                 | 0                                     | 0                                 |
|             | Mouth Sub_R            | 0                                       | 0                                | 0                               | 83                             | 0                                 | 0                                 | 0                                     | 0                                 |
|             | Mouth Sub_L            | 8                                       | 0                                | 0                               | 1949                           | 0                                 | 0                                 | 0                                     | 0                                 |
|             | Stomach Gastric_Body   | 0                                       | 0                                | 0                               | 0                              | 0                                 | 0                                 | 0                                     | 0                                 |
|             | Stomach Gastric_Antrum | 3                                       | 0                                | 0                               | 0                              | 0                                 | 2                                 | 0                                     | 0                                 |
|             | Duodenum Duodenum      | 18                                      | 0                                | 0                               | 0                              | 1                                 | 3                                 | 0                                     | 0                                 |
|             | Colon Transverse       | 37                                      | 105                              | 0                               | 0                              | 52                                | 136                               | 0                                     | 0                                 |
|             | Colon Sigmoid          | 12                                      | 0                                | 0                               | 0                              | 0                                 | 0                                 | 0                                     | 0                                 |
|             | Colon Rectum           | 18                                      | 162                              | 0                               | 0                              | 0                                 | 0                                 | 0                                     | 0                                 |
| Stool Stool | 28                     | 155                                     | 206                              | 0                               | 0                              | 0                                 | 0                                 | 0                                     |                                   |
| Subject 3   | Mouth Tongue           | 20                                      | 0                                | 0                               | 1                              | 0                                 | 0                                 | 0                                     | 0                                 |
|             | Mouth Supra_R          | 0                                       | 0                                | 1                               | 0                              | 0                                 | 0                                 | 0                                     | 0                                 |
|             | Mouth Supra_L          | 17                                      | 0                                | 0                               | 0                              | 0                                 | 0                                 | 0                                     | 0                                 |
|             | Mouth Sub_R            | 28                                      | 0                                | 0                               | 0                              | 0                                 | 1                                 | 0                                     | 0                                 |
|             | Mouth Sub_L            | 67                                      | 0                                | 0                               | 1                              | 0                                 | 0                                 | 0                                     | 0                                 |
|             | Stomach Gastric_Body   | 0                                       | 0                                | 0                               | 0                              | 0                                 | 0                                 | 0                                     | 0                                 |
|             | Stomach Gastric_Antrum | 0                                       | 0                                | 0                               | 0                              | 1                                 | 1                                 | 0                                     | 0                                 |

|                  |          |                |        |   |    |    |   |   |   |   |
|------------------|----------|----------------|--------|---|----|----|---|---|---|---|
|                  | Duodenum | Duodenum       | 24     | 0 | 0  | 0  | 0 | 1 | 0 | 0 |
|                  | Colon    | Transverse     | 125994 | 0 | 0  | 0  | 0 | 0 | 0 | 0 |
|                  | Colon    | Sigmoid        | 220481 | 0 | 1  | 0  | 0 | 0 | 0 | 0 |
|                  | Colon    | Rectum         | 22972  | 0 | 0  | 0  | 1 | 1 | 0 | 0 |
|                  | Stool    | Stool          | 60563  | 1 | 0  | 0  | 1 | 2 | 0 | 0 |
|                  | Mouth    | Tongue         | 0      | 0 | 16 | 10 | 0 | 0 | 0 | 0 |
|                  | Mouth    | Supra_R        | 0      | 0 | 0  | 0  | 0 | 0 | 0 | 0 |
|                  | Mouth    | Supra_L        | 1      | 0 | 83 | 0  | 0 | 0 | 0 | 0 |
|                  | Mouth    | Sub_R          | 9      | 0 | 0  | 0  | 0 | 0 | 0 | 0 |
|                  | Mouth    | Sub_L          | 0      | 0 | 0  | 0  | 0 | 0 | 0 | 0 |
|                  | Stomach  | Gastric_Antrum | 1      | 0 | 0  | 0  | 0 | 0 | 0 | 0 |
|                  | Duodenum | Duodenum       | 0      | 0 | 0  | 0  | 0 | 0 | 0 | 0 |
| <b>Subject 4</b> | Colon    | Transverse     | 17086  | 0 | 0  | 1  | 0 | 0 | 0 | 0 |
|                  | Colon    | Sigmoid        | 10108  | 0 | 0  | 0  | 0 | 0 | 0 | 0 |
|                  | Colon    | Rectum         | 0      | 0 | 0  | 0  | 0 | 0 | 0 | 0 |
|                  | Stool    | Stool          | 24     | 2 | 1  | 0  | 0 | 0 | 0 | 0 |
